# Supplementary material for: Reduced SHARPIN and LUBAC Formation May Contribute to CCl4- or Acetaminophen-Induced Liver Cirrhosis in Mice
Source: MDPI journal article supplement (doi:10.3390/ijms18020326), 2017-02-04
Supplement: s1 [file s1]

## Supplementary Materials: Reduced SHARPIN and LUBAC Formation May Contribute to CCl<sub>4</sub>- or Acetaminophen-Induced Liver Cirrhosis in Mice

Takeshi Yamamotoya, Yusuke Nakatsu, Yasuka Matsunaga, Toshiaki Fukushima, Hiroki Yamazaki, Sunao Kaneko, Midori Fujishiro, Takako Kikuchi, Akifumi Kushiya, Fuminori Tokunaga, Tomoichiro Asano and Hideyuki Sakoda

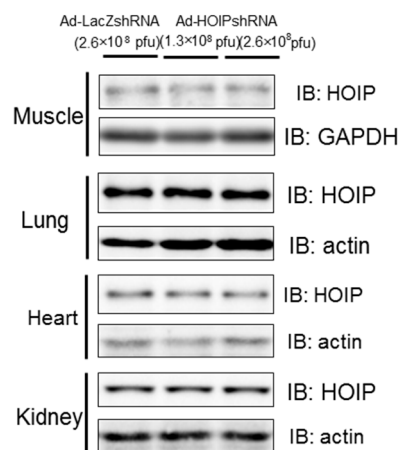

**Figure S1.** HOIP expression level was unchanged in extrahepatic tissues of L-HOIP KD mice.
